# Supplementary material for: A New Pyrrolidone Alkaloid and Other Constituents from Rourea oligophlebia Stems
Source: Hindawi journal article supplement (doi:10.1155/2021/6659106), 2021-08-18
Supplement: f1 [file 6659106.f1.docx]

**SUPPLEMENTARY MATERIALS**

**A New Pyrrolidone Alkaloid and Other Constituents from *Rourea oligophlebia* Stems**

Thuc Dinh Ngoc1*, Mai Vu Thi Ha1, Luong Ngo Xuan2, Huan Trinh Thi2, Huong Nguyen Thi2, Mai Nguyen Thi Ngoc2, Giap Tran Huu3, Oanh Vu Thi Kim3 and Thanh Nguyen Le3

1 Department of Science and Technology Management, Hong Duc University, Thanh Hoa City, Vietnam.

2 Faculty of Natural Sciences, Hong Duc University, Thanh Hoa City, Vietnam.

3 Institute of Marine Biochemistry (IMBC) and Graduate University of Science and Technology (GUST), Vietnam Academy of Science and Technology (VAST), 18 Hoang Quoc Viet, Caugiay, Hanoi, Vietnam.

*Correspondence should be addressed to Thuc N. Dinh; [dinhngocthuc@hdu.edu.vn](mailto:dinhngocthuc@hdu.edu.vn)

**Figure S1**: Structure of known compounds **2**-**15**

**Figure S2**. HR-ESI-MS spectrum of compound **1**

**Figure S3**. 15N-NMR spectrum of compound **1 (in CDCl3)**

**Figure S4**. IR spectrum of compound **1**


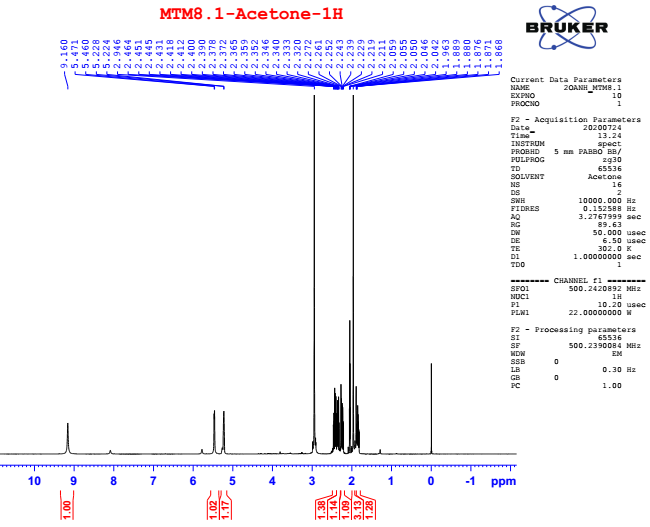


**Figure S5**. 1H-NMR spectrum of compound **1 (in acetone-d6)**


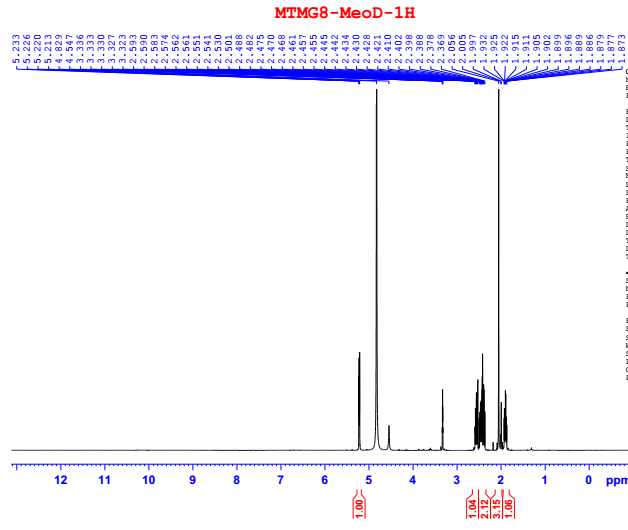


**Figure S6**. 1H-NMR spectrum of compound **1 (in MeOH-d4)**


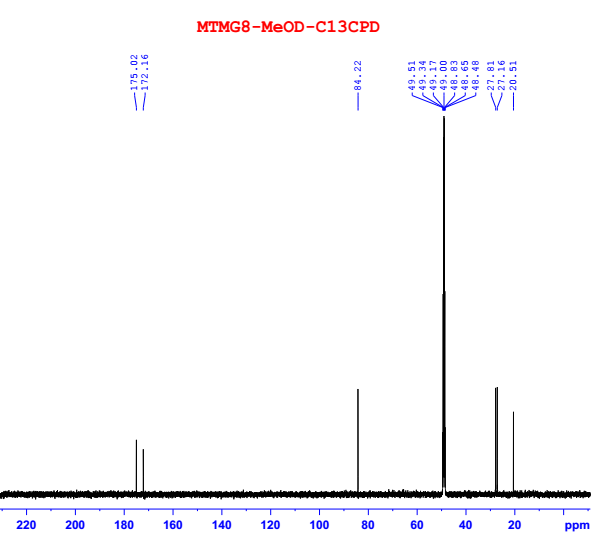


**Figure S7**. 13C-NMR spectrum of compound **1 (in MeOH-d4)**


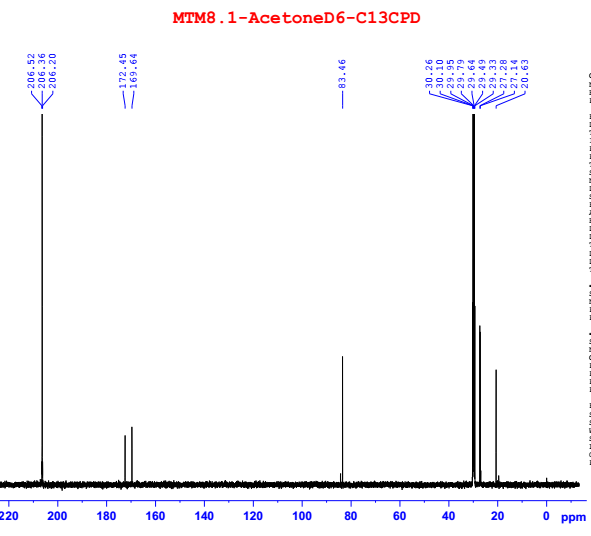


**Figure S8**. 13C-NMR spectrum of compound **1 (in acetone-d6)**


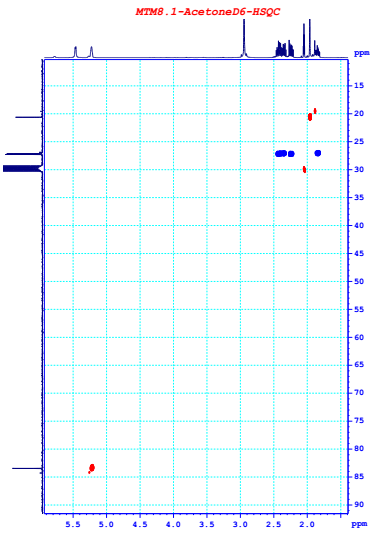


**Figure S9**. HSQC spectrum of compound **1 (in acetone-d6)**


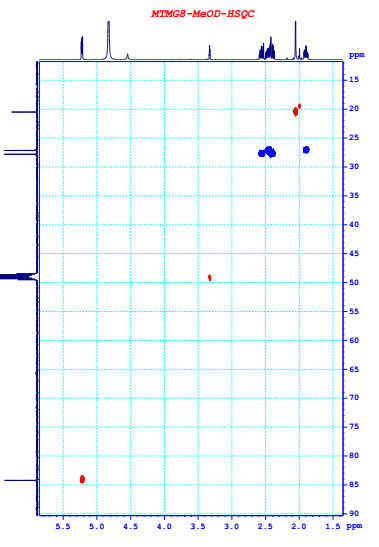


**Figure S10**. HSQC spectrum of compound **1 (in MeOH-d4)**


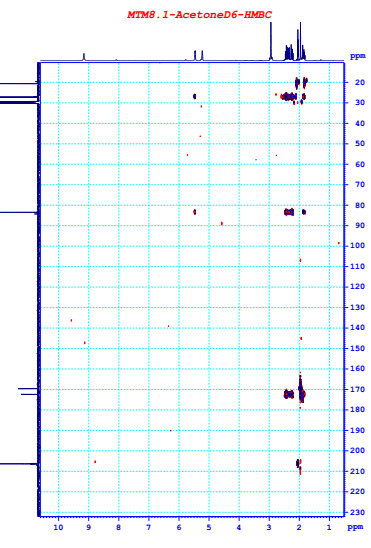


**Figure S11**. HMBC spectrum of compound **1 (in acetone-d6)**


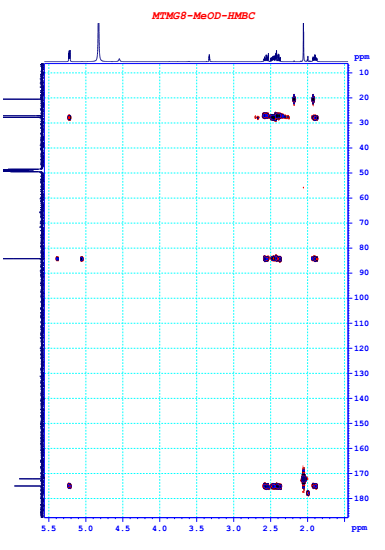


**Figure S12**. HMBC spectrum of compound **1 (in MeOH-d4)**


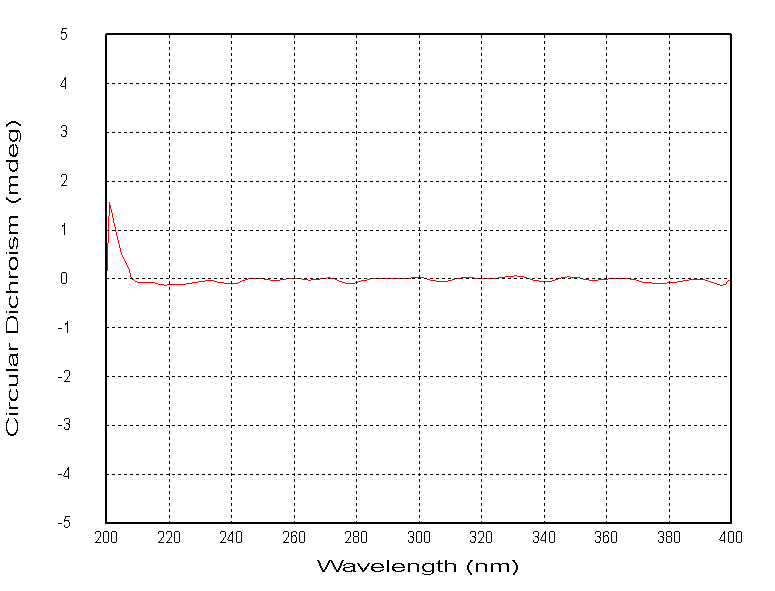


**Figure S13**. CD spectrum of compound **1**

**Table S1**: Cytotoxicity of isolated compounds

| **Compound** | IC50 (µg/mL) | | | |
| --- | --- | --- | --- | --- |
| KB | Hep-G2 | Lu | MCF-7 |
| **1** | >128 | >128 | >128 | >128 |
| **2** | >128 | >128 | >128 | >128 |
| **3** | >128 | >128 | >128 | >128 |
| **4** | >128 | >128 | >128 | >128 |
| **6** | 63.34±1.22 | 18.73±0.40 | 47.15±0.70 | 22.76±0.43 |
| **7** | 36.46±0.81 | 32.00±0.58 | 83.27±1.53 | 32.03±0.61 |
| **8** | >128 | 21.2±0.46 | >128 | 32.0±0.62 |
| **9** | 63.38±1.27 | 20.80±0.42 | 71.5±1.67 | 20.22±0.38 |
| **10** | >128 | 32.00±0.55 | >128 | 43.63±0.90 |
| **11** | 43.73±0.70 | 37.56±0.81 | 21.04±0.52 | >128 |
| **13** | >128 | >128 | >128 | >128 |
| **14** | >128 | >128 | >128 | 99.76±2.30 |
| **15** | >128 | 99.5±2.37 | >128 | 88.72±1.7 |
| Ellipticine | 0.3±0.05 | 0.33±0.05 | 0.45±0.05 | 0.46±0.03 |
